# Supplementary material
Source: MDPI journal article supplement (https://www.mdpi.com/2227-7102/12/6/407)
Supplement: s1 [file s1]

## Supplemental File 2 - Survey Addendum

---

*Display This Question:*

*If Are you interested in participating in research during medical school? = Not interested*

Q16 On an earlier question, you indicated that you are not interested in participating in research during medical school. For the items below, please indicate how likely each might be at encouraging you to participate in research during medical school.

| Definitely<br>will not | Probably<br>will not | Might or<br>might not | Probably<br>will | Definitely<br>will |
|------------------------|----------------------|-----------------------|------------------|--------------------|
| 1                      | 2                    | 3                     | 4                | 5                  |

|                                                                                                          |  |
|----------------------------------------------------------------------------------------------------------|--|
| Financial compensation ()                                                                                |  |
| Transcript credit ()                                                                                     |  |
| A formalized Distinction in Research designation ()                                                      |  |
| Strong likelihood of gaining a publication ()                                                            |  |
| Opportunity for a specific kind of research (e.g., certain topic area, clinical, translational, etc.) () |  |
| Opportunity for funding of student-initiated research projects ()                                        |  |
| Improved communication of available research opportunities ()                                            |  |
| Availability of a "point person" for connecting students with available research opportunities ()        |  |
| Opportunity for flexible time commitment during research involvement ()                                  |  |
| Opportunity for short-term involvement in research projects ()                                           |  |
| Improved research facilities and instrumentation ()                                                      |  |
| Opportunity for a dual degree program (such as DO/MS, DO/PhD, etc.) ()                                   |  |
| Likelihood of travel opportunities to conferences, meetings, etc. ()                                     |  |
| Availability of a dedicated period of time to be involved in research ()                                 |  |
| Instruction in "how to do research" ()                                                                   |  |

-----  
*Display This Question:*

*If Are you interested in participating in research during medical school? = Maybe*

Q17 On an earlier question, you indicated that you may be interested in participating in research during medical school. For the items below, please indicate how likely each might be at encouraging you to participate in research during medical school.

Definitely will not    Probably will not    Might or might not    Probably will    Definitely will

|                                                                                                          | 1 | 2 | 3 | 4 | 5 |
|----------------------------------------------------------------------------------------------------------|---|---|---|---|---|
| Financial compensation ()                                                                                |   |   |   |   |   |
| Transcript credit ()                                                                                     |   |   |   |   |   |
| A formalized Distinction in Research designation ()                                                      |   |   |   |   |   |
| Strong likelihood of gaining a publication ()                                                            |   |   |   |   |   |
| Opportunity for a specific kind of research (e.g., certain topic area, clinical, translational, etc.) () |   |   |   |   |   |
| Opportunity for funding of student-initiated research projects ()                                        |   |   |   |   |   |
| Improved communication of available research opportunities ()                                            |   |   |   |   |   |
| Availability of a "point person" for connecting students with available research opportunities ()        |   |   |   |   |   |
| Opportunity for flexible time commitment during research involvement ()                                  |   |   |   |   |   |
| Opportunity for short-term involvement in research projects ()                                           |   |   |   |   |   |
| Improved research facilities and instrumentation ()                                                      |   |   |   |   |   |
| Opportunity for a dual degree program (such as DO/MS, DO/PhD, etc.) ()                                   |   |   |   |   |   |
| Likelihood of travel opportunities to conferences, meetings, etc. ()                                     |   |   |   |   |   |
| Availability of a dedicated period of time to be involved in research ()                                 |   |   |   |   |   |
| Instruction in "how to do research" ()                                                                   |   |   |   |   |   |

Display This Question:

*If Are you interested in participating in research during medical school? = Yes*

*Or Are you interested in participating in research during medical school? = I am currently participating in research*

Q18 On an earlier question, you indicated that you are interested in participating in research during medical school or are currently participating in research. For the items below, please indicate how likely each might be at further encouraging you to participate in research during medical school.

|                                                                                                          | Definitely<br>will not                                                               | Probably<br>will not | Might or<br>might not | Probably<br>will | Definitely<br>will |
|----------------------------------------------------------------------------------------------------------|--------------------------------------------------------------------------------------|----------------------|-----------------------|------------------|--------------------|
|                                                                                                          | 1                                                                                    | 2                    | 3                     | 4                | 5                  |
| Financial compensation ()                                                                                |    |                      |                       |                  |                    |
| Transcript credit ()                                                                                     |    |                      |                       |                  |                    |
| A formalized Distinction in Research designation ()                                                      |    |                      |                       |                  |                    |
| Strong likelihood of gaining a publication ()                                                            |    |                      |                       |                  |                    |
| Opportunity for a specific kind of research (e.g., certain topic area, clinical, translational, etc.) () |    |                      |                       |                  |                    |
| Opportunity for funding of student-initiated research projects ()                                        |    |                      |                       |                  |                    |
| Improved communication of available research opportunities ()                                            |   |                      |                       |                  |                    |
| Availability of a "point person" for connecting students with available research opportunities ()        |  |                      |                       |                  |                    |
| Opportunity for flexible time commitment during research involvement ()                                  |  |                      |                       |                  |                    |
| Opportunity for short-term involvement in research projects ()                                           |  |                      |                       |                  |                    |
| Improved research facilities and instrumentation ()                                                      |  |                      |                       |                  |                    |
| Opportunity for a dual degree program (such as DO/MS, DO/PhD, etc.) ()                                   |  |                      |                       |                  |                    |
| Likelihood of travel opportunities to conferences, meetings, etc. ()                                     |  |                      |                       |                  |                    |
| Availability of a dedicated period of time to be involved in research ()                                 |  |                      |                       |                  |                    |
| Instruction in "how to do research" ()                                                                   |  |                      |                       |                  |                    |

End of Block: Opportunity for research
