# Supplementary material
Source: MDPI journal article supplement (https://www.mdpi.com/2227-7102/12/6/407)
Supplement: s1 [file s1]

## Supplemental File 1 – Main Survey

---

### Start of Block: Default Question Block

What is your age?

---

---

What is the highest degree you have earned?

- ☐ Bachelor's degree (1)
  - ☐ Master's degree (2)
  - ☐ PhD (3)
  - ☐ Professional (PharmD, DPT, etc) (4)
  - ☐ Other (please specify) (5) \_\_\_\_\_
- 

In what field is your bachelor's degree?

- ☐ Basic science (biology, biochemistry, chemistry, physics, etc) (1)
  - ☐ Social science (education, psychology, sociology, economics, etc) (2)
  - ☐ Liberal arts or humanities (English, art, music, history, philosophy, etc) (3)
  - ☐ Applied science (math, engineering, technology, etc) (4)
  - ☐ Other field (please specify) (5) \_\_\_\_\_
  - ☐ I do not hold a bachelor's degree (6)
-

What type of research interests you? Please select all that apply.

- ☐ Basic science (biology, biochemistry, chemistry, physics, etc) (1)
  - ☐ Social science (education, psychology, sociology, economics, etc) (2)
  - ☐ Applied science (math, engineering, technology, etc) (3)
  - ☐ Clinical research (4)
  - ☐ Translational research (5)
  - ☐ Anatomical research (6)
  - ☐ Osteopathic manipulative medicine (7)
  - ☐ Other (please specify) (8)
- 
- ☐ I am not interested in research (9)

-----

Please indicate your level of research experience prior to entering medical school (select all that apply).

- ☐ Independent or mentored research project(s) required as part of a degree requirement (1)
- ☐ Independent or mentored research project(s) outside of degree requirements (2)
- ☐ Research project(s) as part of full-time employment (3)
- ☐ I do not have research experience (4)

*Skip To: QID7 If Please indicate your level of research experience prior to entering medical school (select all th... = I do not have research experience*

-----

*Display This Question:*

*If Please indicate your level of research experience prior to entering medical school (select all th... != I do not have research experience*

Did your prior research experience result in any of the following? Please select all that apply.

- ☐ Your authorship on a research presentation or poster at a conference (1)
- ☐ Your presenting research results at a conference (2)
- ☐ Your authorship on an article published in a peer-reviewed journal (3)
- ☐ I do not know (4)
- ☐ None of these (5)

---

*Display This Question:*

*If What type of research interests you? Please select all that apply. != I am not interested in research*

Are you interested in participating in research during medical school?

- ☐ I am currently participating in research (1)
- ☐ Yes (2)
- ☐ Maybe (3)
- ☐ Not interested (4)

*Skip To: QID9 If Are you interested in participating in research during medical school? = I am currently participating in research*

---

*Display This Question:*

*If Are you interested in participating in research during medical school? = I am currently participating in research*

Which of the following best describes the type of research you are currently participating in?  
Please select all that apply.

- ☐ Basic science (biology, biochemistry, chemistry, physics, etc) (1)
  - ☐ Social science (education, psychology, sociology, economics, etc) (2)
  - ☐ Applied science (math, engineering, technology, etc) (3)
  - ☐ Clinical research (4)
  - ☐ Translational research (5)
  - ☐ Anatomical research (6)
  - ☐ Osteopathic manipulative medicine (7)
  - ☐ Other (please specify) (8)
- 

-----

In your opinion, how valuable is it for medical students to engage in research?

- ☐ Extremely important (1)
  - ☐ Very important (2)
  - ☐ Moderately important (3)
  - ☐ Slightly important (4)
  - ☐ Not important (5)
-

In your opinion, what are the benefits of participating in research during medical school? Please select all that apply.

- ☐ Enhancing competitiveness for residency slots (1)
- ☐ Developing skills for future use as a clinician researcher (2)
- ☐ Engaging with faculty member(s) (3)
- ☐ Deepening understanding of curricular concepts (4)
- ☐ Other (please specify) (5)  

---
- ☐ No benefit (6)

End of Block: Default Question Block

---

Start of Block: Opportunity for research

In your opinion, do opportunities exist at MU-COM for students to participate in research during medical school?

- ☐ Yes, many (1)
- ☐ Yes, some (2)
- ☐ No (3)
- ☐ Don't know (4)

---

*Display This Question:*

*If Are you interested in participating in research during medical school? != Not interested*

Q15 In your opinion, do research opportunities exist at MU-COM in your area of interest?

- ☐ Yes, many (1)
  - ☐ Yes, some (2)
  - ☐ No (3)
  - ☐ Don't know (4)
- 

Which of the following might encourage you to participate in research during medical school?  
Please select all that apply.

- ☐ Extra credit in coursework (1)
  - ☐ Monetary compensation (2)
  - ☐ Opportunity for a specific kind of research (please specify) (3)  
\_\_\_\_\_
  - ☐ Other (please specify) (4)  
\_\_\_\_\_
  - ☐ Nothing (5)
-

Which of the following describes a reason why you might not participate in research during medical school? Please select all that apply.

- ☐ Concern about negatively impacting performance in coursework (1)
- ☐ Preference for other extracurricular activities (2)
- ☐ Lack of opportunity for a specific kind of research (please specify) (3)

---
- ☐ Other (please specify) (4)

---
- ☐ Not applicable (5)
