# Supplementary material
Source: MDPI journal article supplement (https://www.mdpi.com/2227-7102/12/6/407)
Supplement: s1 [file s1]

Archive with 2 entries (2 files):
- Supplemental_File_1.pdf
- Supplemental_File_2.pdf
